# Supplementary material
Source: Springer Nature journal article supplement (https://www.springermedizin.de/resource/supplementary/13033_2012_141_MOESM2_ESM.pdf/9651892)
Supplement: MOESM2 [file 9651892]

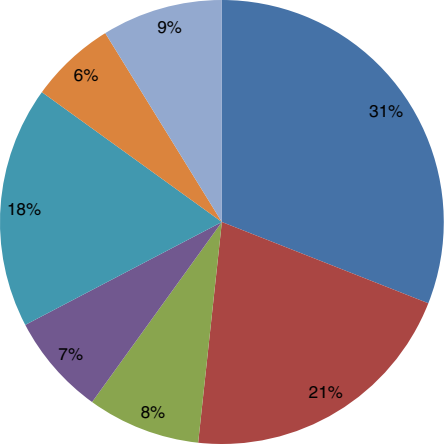

- No Problem Type (n=109)
- Stress only Type (n=73)
- Self-Harm Type (n=29)
- Psychosis Type (n=26)
- Depression Type (n=62)
- Single Problem Type (n=22)
- Miscellaneous Type (n=31)

N = 352; Missing = 11
